# Supplementary material for: Identification of a TRP channel-related risk model for predicting prognosis and therapeutic effects of patients with hepatocellular carcinoma
Source: PubMed Central journal article supplement (PMC10645640; doi:10.1007/s00432-023-05394-7), 2023-09-21

**HCC****Normal****HCC****Normal****PIK3R1**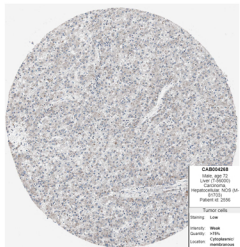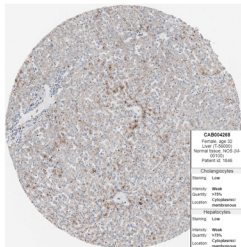**PPP1CC**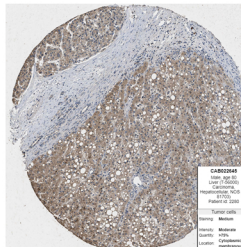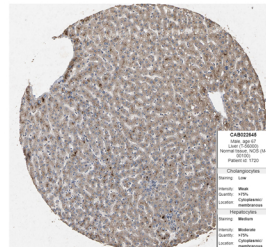**PLCB1**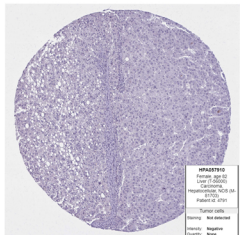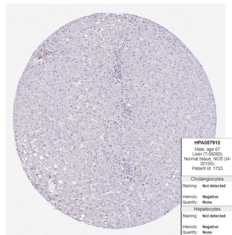**PRKCD**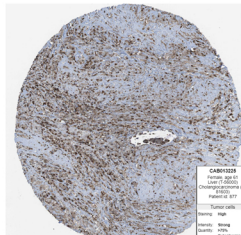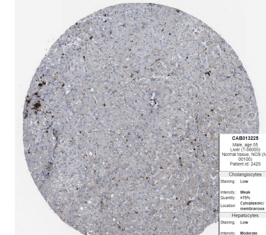**PLCB3**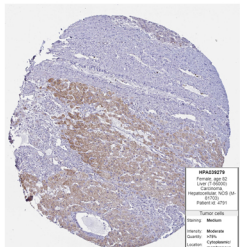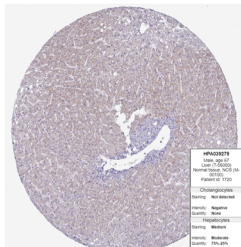**TRPC4AP**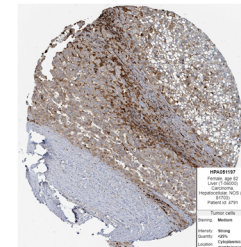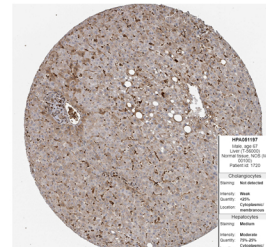**PPP1CB**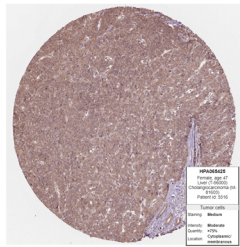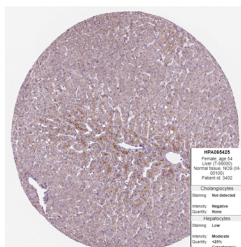**TRPM1**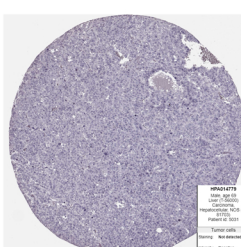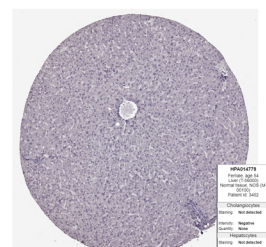

Supplement: 432_2023_5394_MOESM3_ESM.pdf [file 432_2023_5394_MOESM3_ESM.pdf]
