# Supplementary material for: Identification of a TRP channel-related risk model for predicting prognosis and therapeutic effects of patients with hepatocellular carcinoma
Source: PubMed Central journal article supplement (PMC10645640; doi:10.1007/s00432-023-05394-7), 2023-09-21
Supplement: 432_2023_5394_MOESM1_ESM.pdf [file 432_2023_5394_MOESM1_ESM.pdf]

# TCGA LIHC OS

Group + High TMB + Low TMB

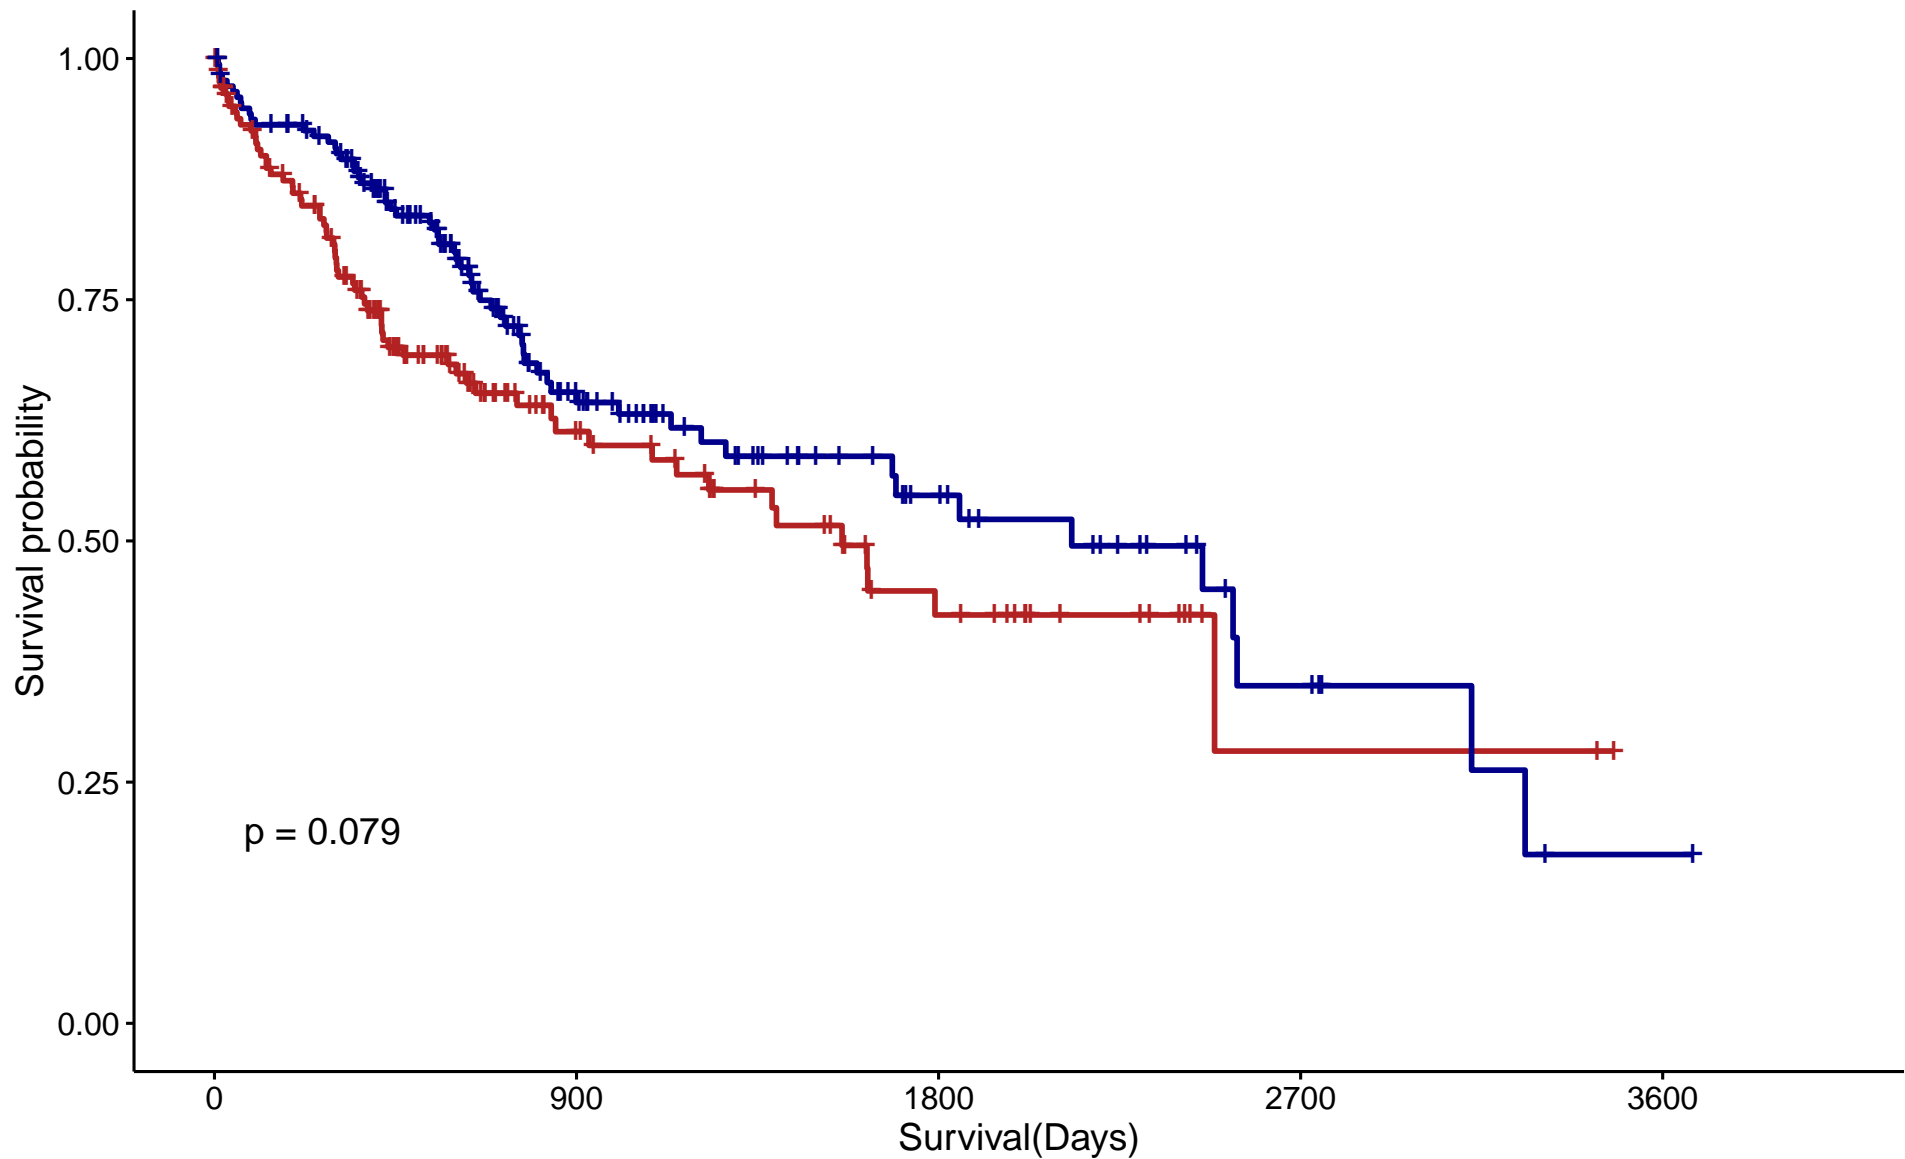

## Number at risk

|   |     |    |    |   |   |
|---|-----|----|----|---|---|
| — | 166 | 44 | 17 | 2 | 0 |
| — | 177 | 60 | 24 | 7 | 1 |

## Cumulative number of events

|   |   |    |    |    |    |
|---|---|----|----|----|----|
| — | 0 | 53 | 63 | 64 | 64 |
| — | 0 | 49 | 55 | 60 | 62 |
