# Supplementary material for: Identification of a TRP channel-related risk model for predicting prognosis and therapeutic effects of patients with hepatocellular carcinoma
Source: PubMed Central journal article supplement (PMC10645640; doi:10.1007/s00432-023-05394-7), 2023-09-21

### TCGA Database

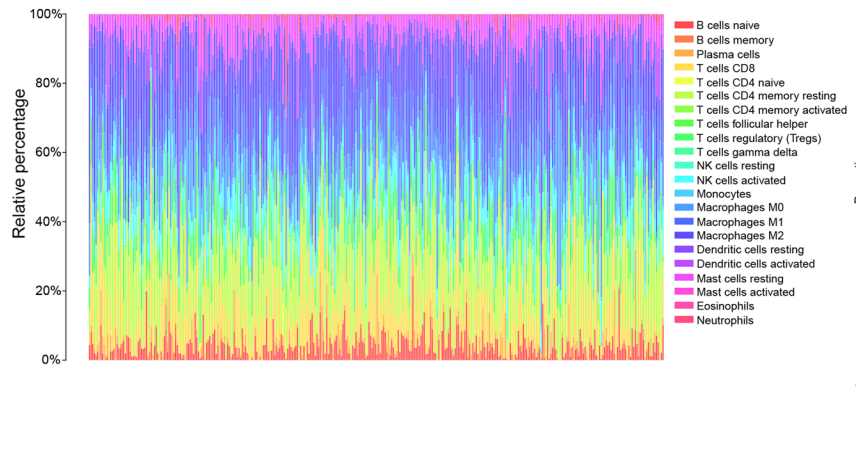

### TCGA CIBERSORT

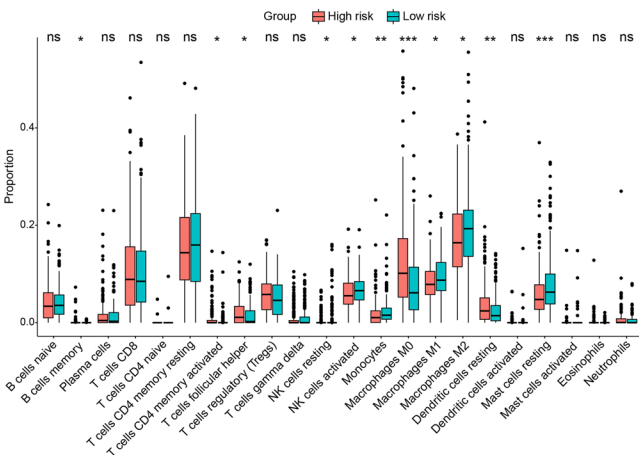

### ICGC Database

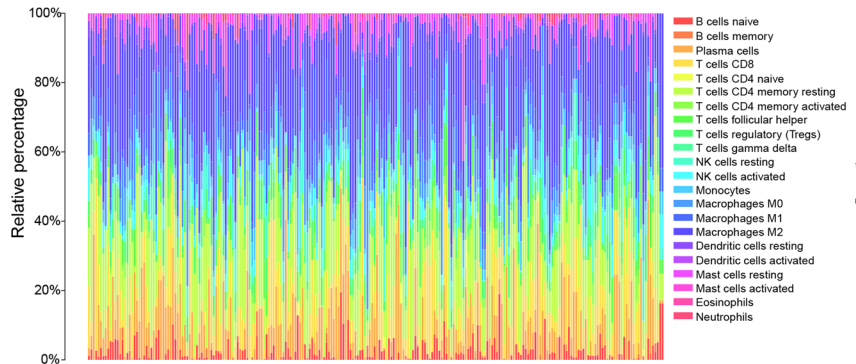

### ICGC CIBERSORT

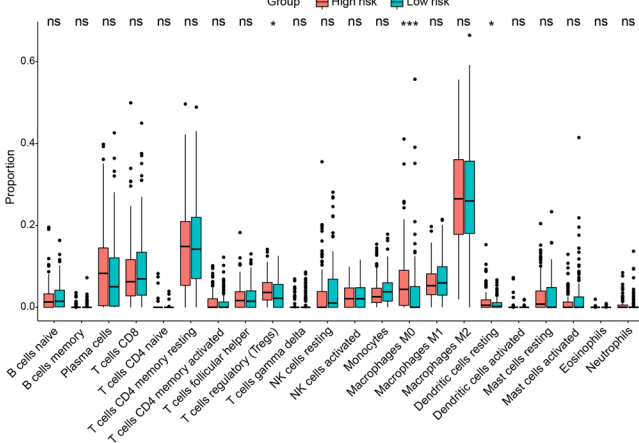

Supplement: 432_2023_5394_MOESM2_ESM.pdf [file 432_2023_5394_MOESM2_ESM.pdf]
